# Supplementary material for: Characterizing the role of the immune microenvironment in multiple myeloma progression at a single-cell level
Source: PubMed Central journal article supplement — Blood Adv. 2022 Aug 20;6(22):5873–83. doi: 10.1182/bloodadvances.2022007217 (PMC9647426; doi:10.1182/bloodadvances.2022007217), 2022-08-20

## Supplemental Text

**Table 1. Patient characteristics**

|                                   | <b>MGUS (n=9)</b> | <b>SMM (n=7)</b> | <b>MM (n=10)</b> |
|-----------------------------------|-------------------|------------------|------------------|
| Median age at diagnosis (min-max) | 57 (41-80)        | 64 (34-71)       | 62 (51-79)       |
| <b>Race</b>                       |                   |                  |                  |
| Caucasian                         | 89% (8)           | 86% (6)          | 90% (9)          |
| African American                  | 0% (0)            | 14% (1)          | 10% (1)          |
| unknown                           | 11% (1)           | 0% (0)           | 0% (0)           |
| <b>Gender</b>                     |                   |                  |                  |
| Male                              | 55% (5)           | 29% (2)          | 90% (9)          |

**Table 2. Cosine similarity between scRNA seq data and flow cytometry results**

|      | MGUS | SMM  | MM   | all  |
|------|------|------|------|------|
| B    | 0.91 | 0.93 | 0.99 | 0.90 |
| T    | 0.97 | 0.99 | 0.99 | 0.98 |
| NK   | 0.86 | 0.79 | 0.92 | 0.80 |
| Mono | 0.95 | 0.97 | 0.99 | 0.96 |

**Table 3. Cell proportions per sample in each disease stage**

### MGUS

|                | MGUS_115821 | MGUS_110071 | MGUS_110858 | MGUS_111326 | MGUS_111557 | MGUS_111889 | MGUS_115131 | MGUS_116169 | MGUS_117111 |
|----------------|-------------|-------------|-------------|-------------|-------------|-------------|-------------|-------------|-------------|
| CD14 Mono      | 18.9        | 19.2        | 11.6        | 15.6        | 18.3        | 12          | 23.2        | 20.4        | 22.3        |
| CD8 Memory_2   | 36.1        | 23.3        | 3.6         | 5.9         | 23.8        | 10.9        | 5.8         | 8.7         | 5.8         |
| CD4 Memory     | 22.9        | 17.7        | 31          | 22.5        | 16.4        | 30.7        | 28          | 28.8        | 7.9         |
| CD16 Mono      | 5.8         | 1.6         | 4.6         | 1.2         | 4.6         | 2           | 7.2         | 1.2         | 0.4         |
| CD4 Naive      | 0.8         | 1.6         | 3.5         | 17.8        | 0.9         | 14.8        | 2.2         | 1.3         | 0.3         |
| Naive B        | 2.2         | 2.8         | 6.7         | 4.2         | 3.8         | 2.5         | 4.8         | 4.7         | 0.2         |
| NK             | 3.3         | 7.6         | 10.7        | 6           | 7.2         | 7           | 7           | 7.6         | 1.5         |
| Prog_B 1       | 0.4         | 0.1         | 2.6         | 0.9         | 2.8         | 0.4         | 0.7         | 2.6         | 1.1         |
| Treg           | 1.3         | 0.2         | 0.7         | 0.4         | 0.2         | 0.3         | 0.4         | 0.5         | 0           |
| Prog_DC        | 0.1         | 0.1         | 0.6         | 0.8         | 0.1         | 0           | 0.3         | 0.3         | 0.3         |
| CD8 Effector_1 | 1.2         | 7.4         | 0.6         | 3.4         | 6.4         | 2.8         | 0.2         | 2           | 1.4         |
| CD8 Effector_2 | 3.3         | 2.9         | 1.2         | 1.4         | 1.5         | 0           | 2.8         | 3.3         | 21.6        |
| CD8 Memory_1   | 0.3         | 0.7         | 0.1         | 0.4         | 0.1         | 0           | 0.3         | 0.3         | 0.6         |
| GMP            | 1           | 2.1         | 2.3         | 1.7         | 3.4         | 0.9         | 3.1         | 5.5         | 16.3        |
| Prog_B 2       | 0.8         | 0           | 1.3         | 0.2         | 0.6         | 0.1         | 0.7         | 0.6         | 0.3         |
| Memory B       | 0.3         | 0.8         | 3.1         | 0.7         | 1.5         | 3.7         | 2.8         | 0.9         | 2.9         |
| CD56 bright NK | 0.3         | 0.3         | 0.1         | 1.9         | 0.3         | 0.3         | 0.5         | 0.1         | 0.1         |
| Prog_Mk        | 0.5         | 0.6         | 0.5         | 0.2         | 0.2         | 0.6         | 0.6         | 0.9         | 1.3         |
| CD8 Naive      | 0.1         | 6.9         | 6.4         | 8.6         | 1.1         | 9.3         | 2.2         | 7.7         | 0.2         |
| cDC2           | 0.1         | 0           | 2           | 1.2         | 0.1         | 0.1         | 1.3         | 0.5         | 1.9         |
| pDC            | 0.2         | 0.4         | 0.4         | 0.6         | 0.8         | 0.5         | 0.1         | 0.9         | 4.9         |
| HSC            | 0.1         | 0.8         | 1           | 0.2         | 1           | 0           | 0           | 0.8         | 6.4         |
| LMPP           | 0           | 0           | 0.1         | 0.3         | 0.1         | 0           | 0.1         | 0.2         | 0.2         |
| MAIT           | 0           | 2.6         | 5           | 3.8         | 3.1         | 0.6         | 4.7         | 0.2         | 1.9         |
| gdT            | 0           | 0.3         | 0.3         | 0.1         | 1.7         | 0.4         | 1           | 0.1         | 0.2         |

## SMM

|                | SMM_108615 | SMM_109248 | SMM_110101 | SMM_112168 | SMM_112288 | SMM_119207 | SMM_84857 |
|----------------|------------|------------|------------|------------|------------|------------|-----------|
| CD14 Mono      | 11.2       | 12.3       | 16.7       | 15.4       | 11.7       | 15.4       | 12.2      |
| CD8 Memory_2   | 12.6       | 23.5       | 14.3       | 6.9        | 9.9        | 7.5        | 10.3      |
| CD4 Memory     | 27.2       | 14.1       | 32         | 19.8       | 21.5       | 20.5       | 17.1      |
| CD16 Mono      | 1.6        | 2.9        | 1.3        | 1.9        | 5.4        | 1.9        | 0.5       |
| CD4 Naive      | 5.3        | 7.6        | 4.6        | 3.4        | 1.9        | 3.6        | 1.1       |
| Naive B        | 4.2        | 2.2        | 1.1        | 4.5        | 14.2       | 1.8        | 12.4      |
| NK             | 4.2        | 6.1        | 8.5        | 5.3        | 20.1       | 21.4       | 5.2       |
| Prog_B 1       | 2.2        | 8.3        | 0.1        | 12.2       | 1.7        | 3.5        | 7.7       |
| Treg           | 0.5        | 0          | 0.6        | 1          | 0.6        | 0.2        | 0         |
| Prog_DC        | 0.3        | 1.1        | 0          | 0.3        | 0          | 0          | 0         |
| CD8 Effector_1 | 1.8        | 0          | 3.3        | 2.5        | 1.1        | 2.1        | 1.1       |
| CD8 Effector_2 | 2.8        | 4          | 0.2        | 5.1        | 1.3        | 3.3        | 8.1       |
| CD8 Memory_1   | 1.5        | 0          | 0          | 0          | 0.1        | 0.2        | 0         |
| GMP            | 2.7        | 6.1        | 0          | 4.5        | 0.4        | 3.5        | 5.8       |
| Prog_B 2       | 0.2        | 1.8        | 0.1        | 3          | 0.3        | 0.5        | 1.1       |
| Memory B       | 2.3        | 0.4        | 1          | 0          | 5.6        | 1.4        | 2.5       |
| CD56 bright NK | 0.2        | 0          | 1.4        | 0.3        | 0.5        | 0.7        | 0         |
| Prog_Mk        | 0.1        | 0.4        | 1.3        | 0.2        | 0.4        | 0.4        | 4.5       |
| CD8 Naive      | 14.4       | 5.4        | 9.9        | 8.5        | 0.3        | 3.8        | 3         |
| cDC2           | 0.8        | 0          | 0.3        | 0          | 0.4        | 1.7        | 1.1       |
| pDC            | 0.4        | 0.7        | 0.1        | 1.9        | 0.4        | 1.4        | 2.1       |
| HSC            | 0.5        | 3.2        | 0          | 1          | 0.3        | 0.3        | 4.1       |
| LMPP           | 0          | 0          | 0          | 0.3        | 0          | 0          | 0         |
| MAIT           | 2.3        | 0          | 2.8        | 1.7        | 1.9        | 4.8        | 0.1       |
| gdT            | 0.4        | 0          | 0.4        | 0.3        | 0          | 0.1        | 0.1       |

## MM

|                | MM_100742 | MM_101011 | MM_107404 | MM_113436 | P06  | P04  | P05  | P03  | P01  | P02  |
|----------------|-----------|-----------|-----------|-----------|------|------|------|------|------|------|
| CD14 Mono      | 23.5      | 18.1      | 16        | 22.4      | 29.7 | 20.8 | 7.8  | 12.1 | 51.8 | 27.6 |
| CD8 Memory_2   | 2.1       | 3.1       | 12.6      | 6.1       | 3.4  | 29.6 | 8.1  | 19.4 | 0.9  | 23   |
| CD4 Memory     | 25.3      | 19.4      | 7.2       | 11.3      | 5.5  | 4.4  | 17.1 | 8.8  | 8.8  | 2.1  |
| CD16 Mono      | 7.3       | 2.5       | 0.2       | 0.4       | 4.7  | 11   | 3.8  | 1.2  | 9.2  | 6.4  |
| CD4 Naive      | 1.7       | 7.5       | 5.1       | 0.8       | 7.6  | 0.8  | 7.2  | 0.8  | 0.1  | 0.2  |
| Naive B        | 0         | 6.2       | 3.5       | 1.1       | 4.5  | 4    | 3    | 0.8  | 5.2  | 1.4  |
| NK             | 22.5      | 12.9      | 1.1       | 4         | 17.6 | 13.7 | 31   | 34.3 | 7.1  | 12.7 |
| Prog_B 1       | 0         | 3.6       | 1.9       | 5         | 0.5  | 0    | 0    | 0    | 0.4  | 0    |
| Treg           | 2.8       | 0.4       | 0         | 0.1       | 0.5  | 0.7  | 0.5  | 0.6  | 0.1  | 1.1  |
| Prog_DC        | 0.3       | 0.4       | 1.2       | 0.8       | 0.8  | 0    | 0.1  | 0    | 0.4  | 0.1  |
| CD8 Effector_1 | 0         | 1.4       | 0.8       | 0.1       | 1.3  | 3.3  | 1.6  | 2    | 0.2  | 4.3  |
| CD8 Effector_2 | 3.1       | 3.1       | 14        | 8         | 4.9  | 2.2  | 4.2  | 11.7 | 2.1  | 7.7  |
| CD8 Memory_1   | 0         | 0.2       | 0.3       | 0.6       | 0    | 0.2  | 0.1  | 0.1  | 0    | 0    |
| GMP            | 1.4       | 6.4       | 8.8       | 20.3      | 3.9  | 1    | 0.3  | 0.2  | 1    | 0.5  |
| Prog_B 2       | 0         | 0.7       | 1         | 1.9       | 0.1  | 0    | 0    | 0    | 0.3  | 0    |
| Memory B       | 2.4       | 0.5       | 6.6       | 0.7       | 2.6  | 5    | 7    | 2.8  | 3.8  | 7.5  |
| CD56 bright NK | 3.5       | 0.1       | 0.1       | 0         | 0.2  | 1    | 1.1  | 1.7  | 1    | 0.2  |
| Prog_Mk        | 2.1       | 0.6       | 0.4       | 0.6       | 0.2  | 0.3  | 0.5  | 0.5  | 0.4  | 2.3  |
| CD8 Naive      | 1.4       | 2.6       | 6.5       | 1.3       | 5.3  | 0    | 3.1  | 1.3  | 1.4  | 0.2  |
| cDC2           | 0         | 0.7       | 3.2       | 2.6       | 1.6  | 0.6  | 0.4  | 0    | 1.8  | 0.5  |
| pDC            | 0.3       | 1.5       | 5         | 7.4       | 4    | 0.6  | 1.7  | 0    | 2.1  | 0.4  |
| HSC            | 0         | 1.4       | 2         | 3.7       | 0.1  | 0.1  | 0.1  | 0.2  | 0    | 0.4  |
| LMPP           | 0.3       | 0.4       | 0.6       | 0.6       | 0.1  | 0    | 0.1  | 0    | 0    | 0.4  |
| MAIT           | 0         | 3.7       | 2         | 0.1       | 0.7  | 0.6  | 0.8  | 0.3  | 1.2  | 1    |
| gdT            | 0         | 2.5       | 0         | 0         | 0    | 0.2  | 0.2  | 1.2  | 1    | 0    |

**Figure 1.** Quantitative alterations of distinct cell subsets from progression of monoclonal gammopathy of undetermined significance (MGUS) to smoldering MM (SMM) (A), SMM to MM (B) and MGUS to advanced stages (ADV= SMM and MM, C) and precursor stages (MGUS/SMM) to newly diagnosed MM (NDMM) in each dataset and the combined data. Significance is shown in black asterisks for the single datasets and in red for the combined dataset.

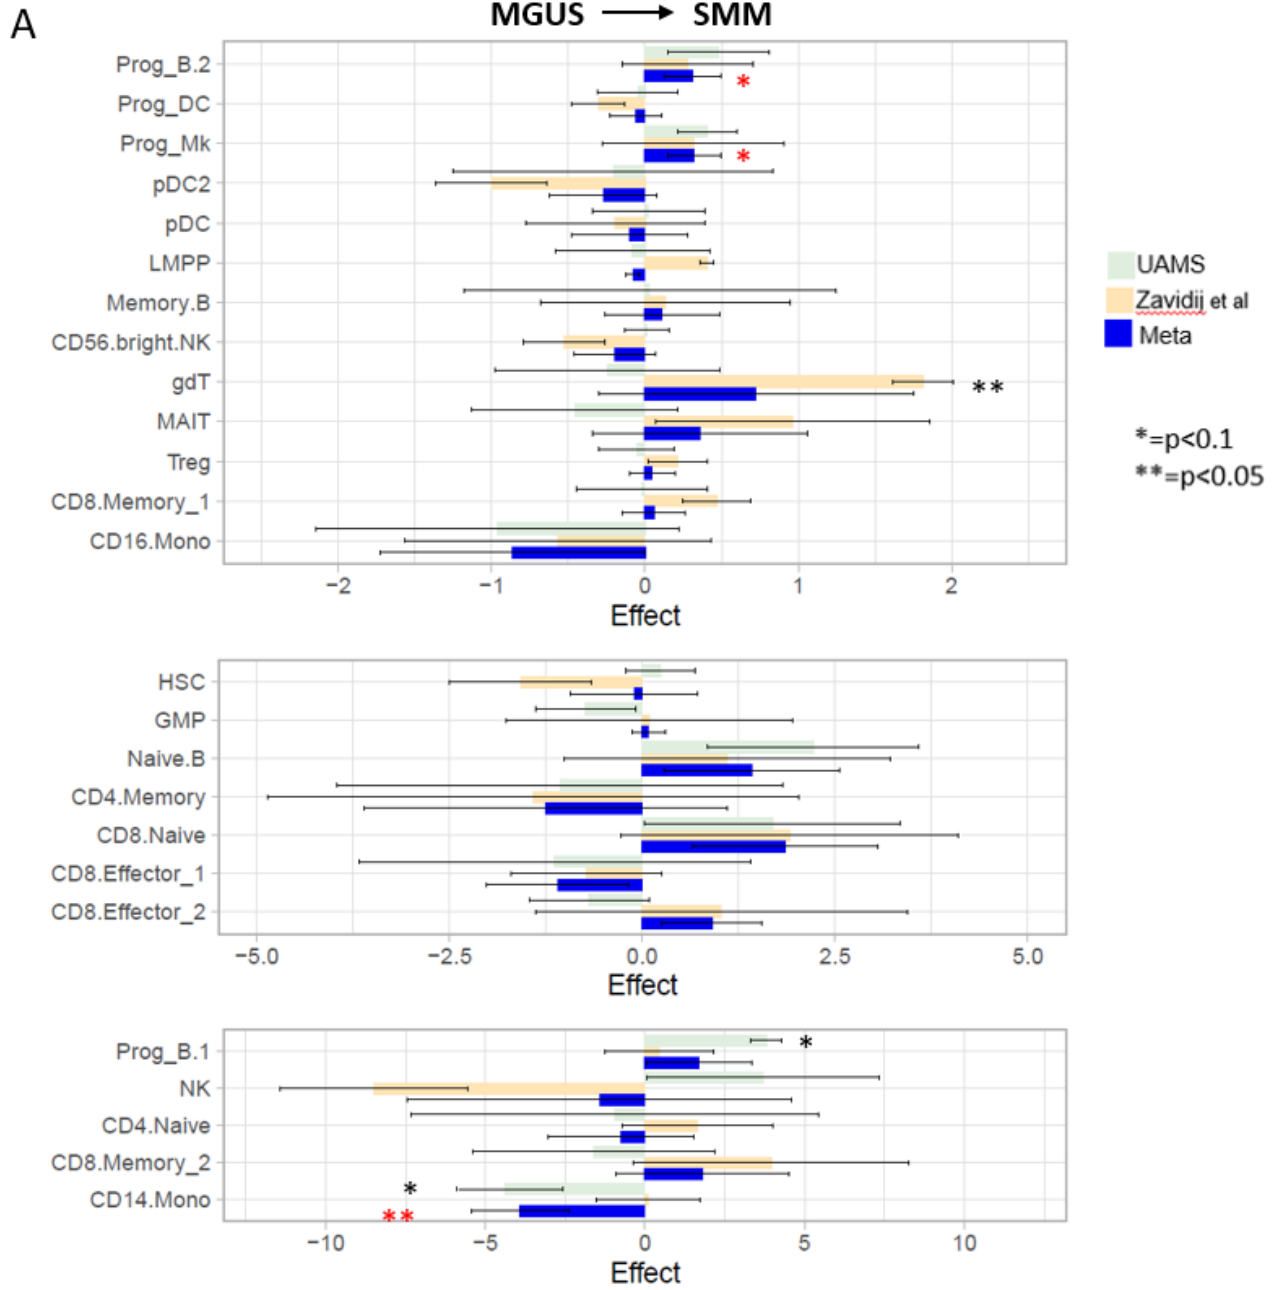

B

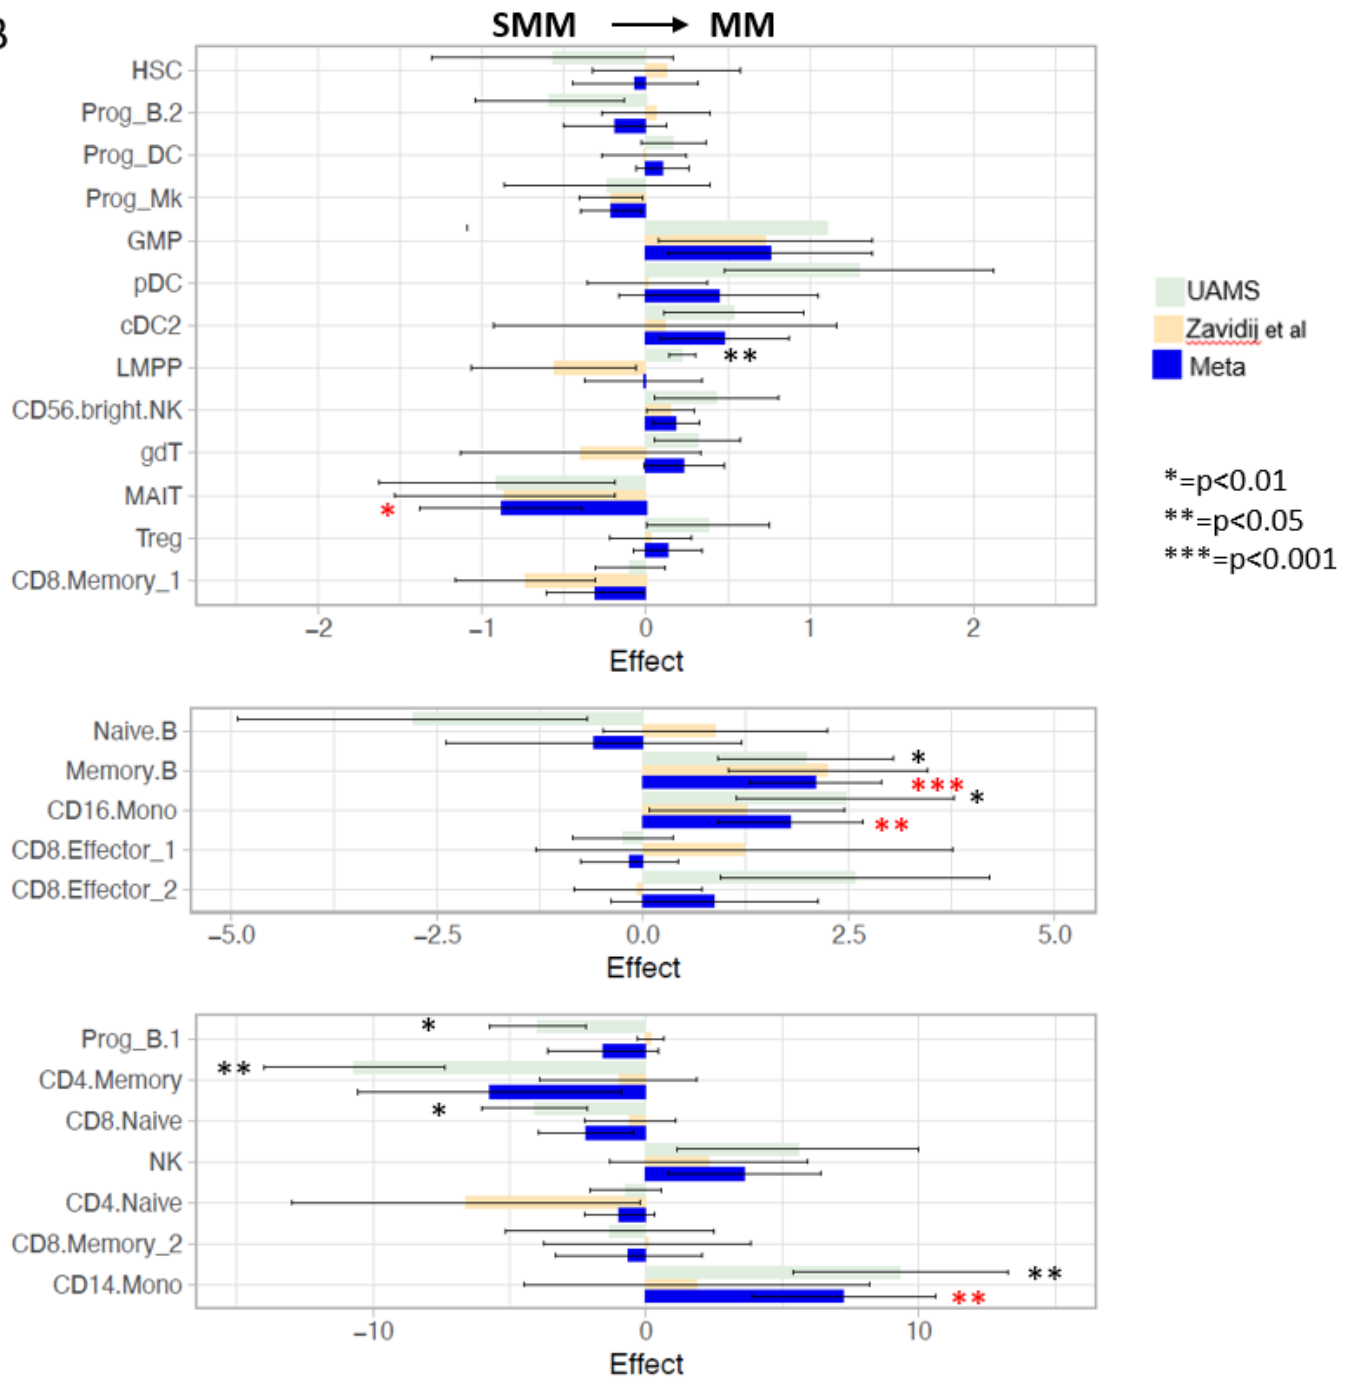

C

MGUS → SMM/MM

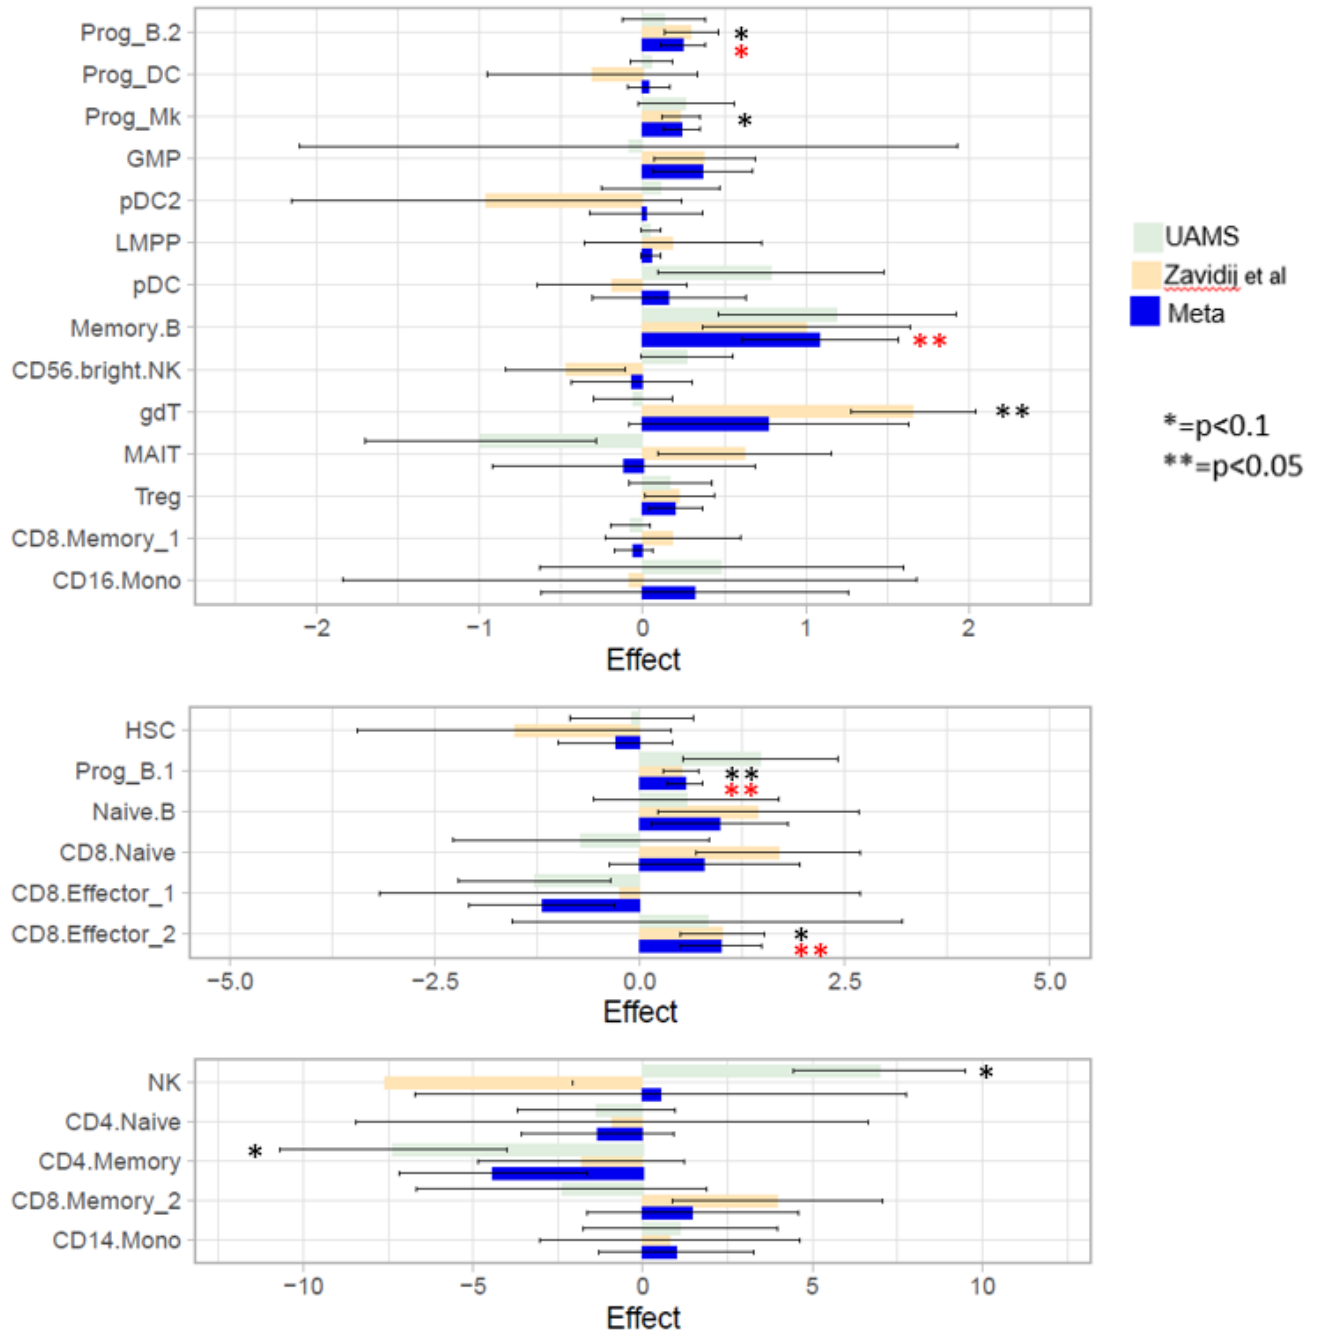

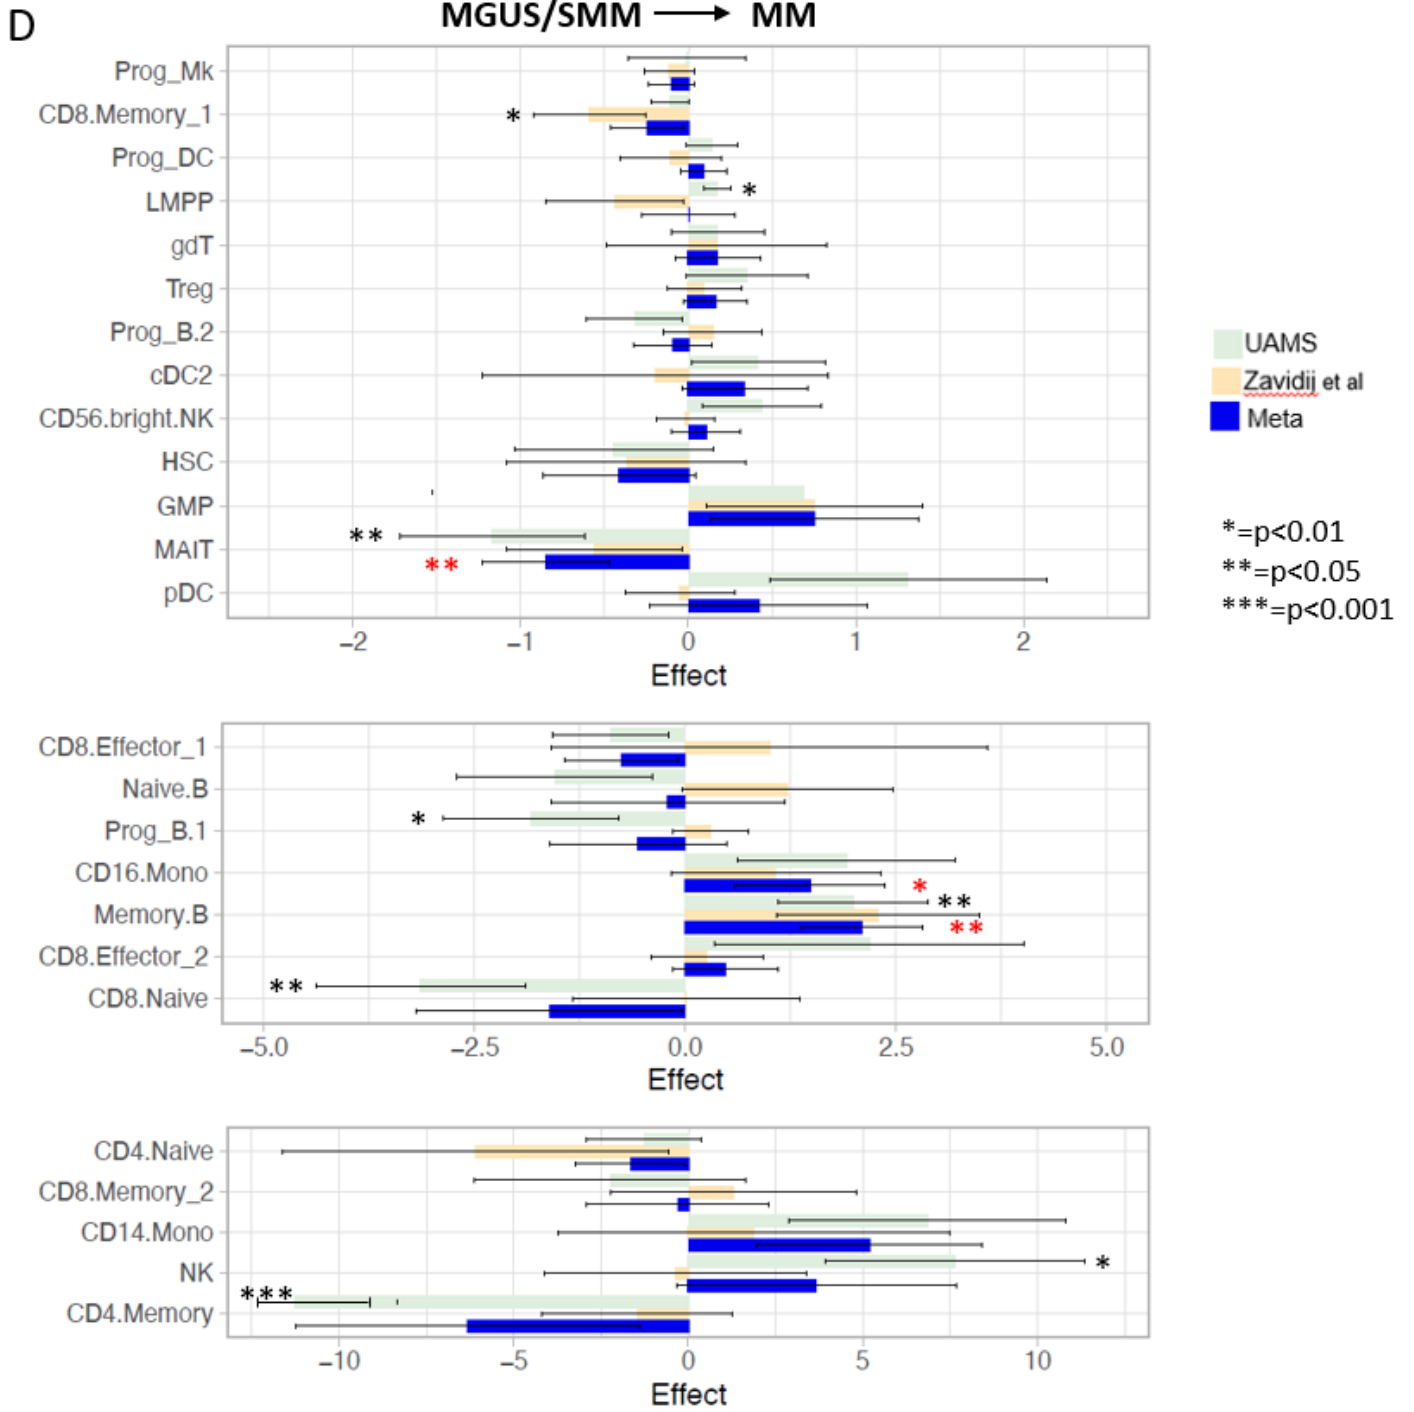

**Figure 2.** Heatmap of cell subset expression for each individual patient. Samples from the external dataset are annotated by disease stage\_extern and followed by the ID from the original manuscript.

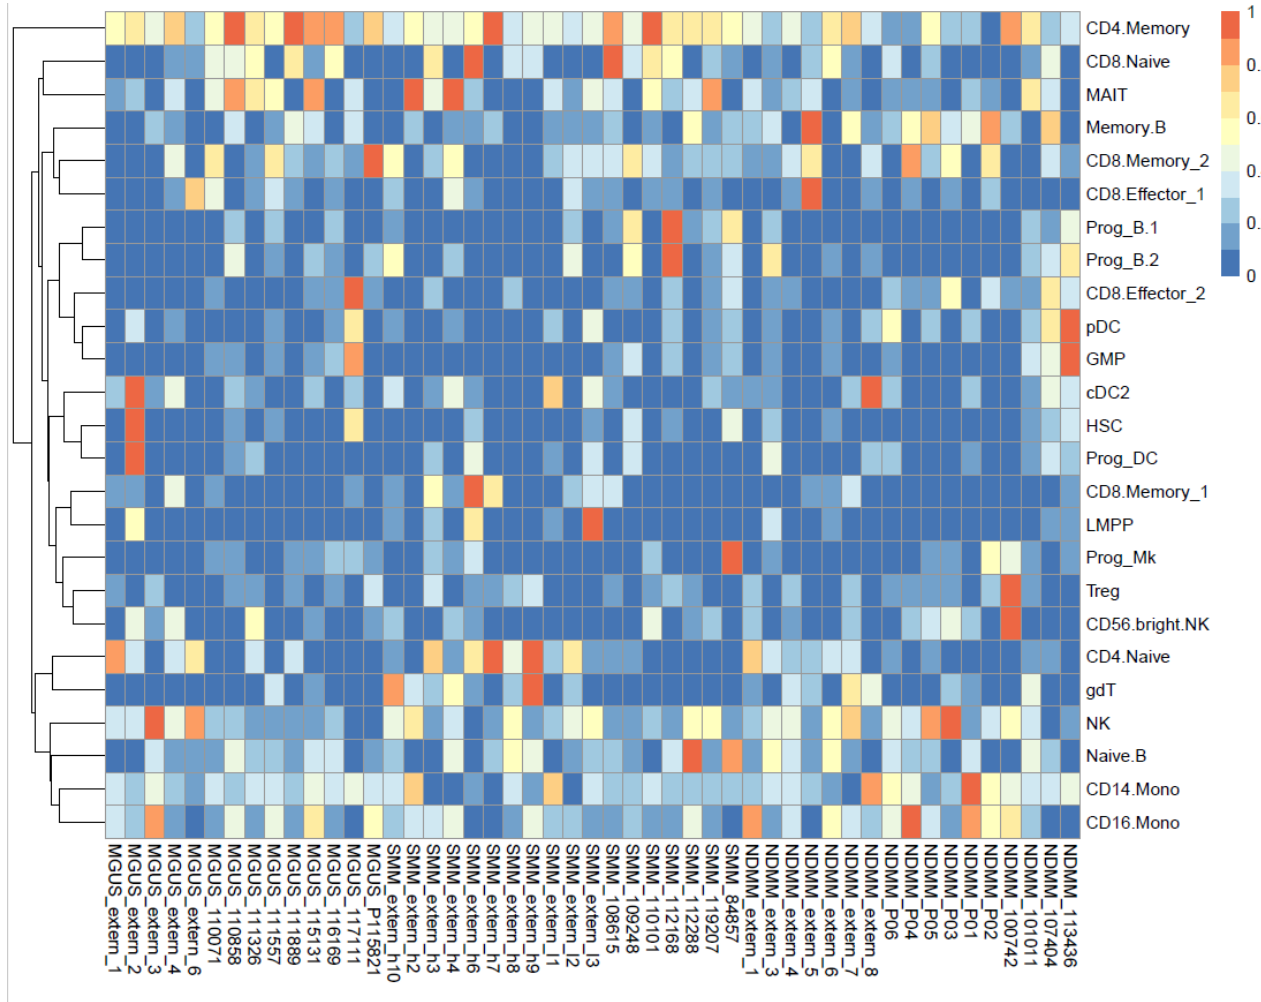

**Figure 3.** Proportion of B cells (A), T cells (B), CD56 NK cells (C) and monocytes in the BM aspirate by 8-color flow cytometry.

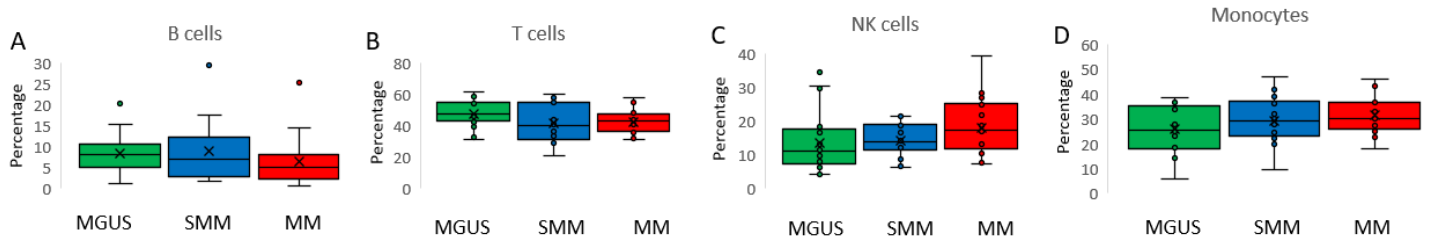

**Figure 4.** Proportion of CD4 T cells (A), CD8 T cells (B) and CD56 NK cells (C) in the peripheral blood by disease stage. Fig

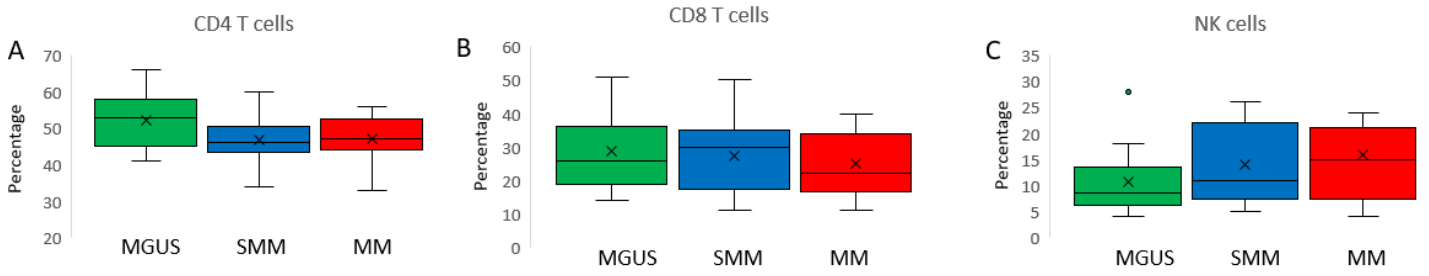

Supplement: BLOODA_ADV-2022-007217-mmc1.pdf [file BLOODA_ADV-2022-007217-mmc1.pdf]
